# Supplementary material for: FKBP51 modulates steroid sensitivity and NFκB signalling: A novel anti‐inflammatory drug target
Source: PubMed Central journal article supplement — Eur J Immunol. 2018 Sep 14;48(11):1904–14. doi: 10.1002/eji.201847699 (PMC6282724; doi:10.1002/eji.201847699), 2018-09-14
Supplement: EJI-48-1904-s002.pdf [file EJI-48-1904-s002.pdf]

# European Journal of Immunology

Supporting Information

for

DOI 10.1002/eji.201847699

Marc Kästle, Barbara Kistler, Thorsten Lamla, Tom Bretschneider, David Lamb,  
Paul Nicklin and David Wyatt

**FKBP51 modulates steroid sensitivity and NF $\kappa$ B signalling: A novel  
anti-inflammatory drug target**

| Accession | Protein                         | Identified Peptides (score)                                                                                                                                                                                                                                                                                                                                                                                                                                                                                                                                                                                                                                                                                                                                               | Mascot Score |
|-----------|---------------------------------|---------------------------------------------------------------------------------------------------------------------------------------------------------------------------------------------------------------------------------------------------------------------------------------------------------------------------------------------------------------------------------------------------------------------------------------------------------------------------------------------------------------------------------------------------------------------------------------------------------------------------------------------------------------------------------------------------------------------------------------------------------------------------|--------------|
| P02768    | Serum albumin                   | YLYEIAR (31)<br>LVTDLTK (21)<br>YICENQDSISSK (18)<br>KVPQVSTPTLVEVSR (60)<br>VPQVSTPTLVEVSR (33)                                                                                                                                                                                                                                                                                                                                                                                                                                                                                                                                                                                                                                                                          | 109          |
| P08238    | Heat shock protein HSP 90-beta  | ELISNASDALDK (76)<br>IRYESLTDPSK (27)<br>YESLTDPSKLDGSK (34)<br>IDIIPNPQER (18)<br>TLTLVDTGIGMTK (81)<br>ADLNNLGTIAK (60)<br>AFMEALQAGADISMIGQFVGFGFYSAYLVAEK (57)<br>VVVITK (24)<br>HNDDEQYAWESSAGGSFTVR (47)<br>ADHGPIGR (42)<br>EDQTEYLEER (53)<br>HSQFIGYPITLYLEK (53)<br>YIDQEELNK (38)<br>NPDDITQEEYGEFYK (74)<br>SLTNDWEDHLAVK (56)<br>HFSVEGQLEFR (58)<br>ALLFIPR (36)<br>APFDLFENK (50)<br>VFIMDSCDELIPEYLNFR (35)<br>GVVDSDELPLNISR (72)<br>KCLELFSLEAEDKENYK (44)<br>FYEAFSK (36)<br>YHTSQSGDEMTSLSEYVSR (51)<br>SIYYITGESK (54)<br>EQVANSFAFVER (62)<br>GFEVVMTPEIDEYCVQQLK (64)<br>EGLELPEDEEEK (33)<br>LVSSPCCIVTSTYGWTANMER (95)<br>DNSTMGYMMAK (61)<br>KHLEINPDHPIVETLR (46)<br>DLVLLLFETALLSSGFSLEDPQTHSNR (87)<br>LGLGIDEVAAEENPAAVPDEIPPLEGDEDASR (44) | 1808         |
| P07900    | Heat shock protein HSP 90-alpha | ELISNSSDALDK (44)<br>IRYESLTDPSK (27)<br>YESLTDPSKLDGSK (34)<br>ELHINLIPNK (36)<br>TLTIVDTGIGMTK (73)<br>ADLNNLGTIAK (60)<br>AFMEALQAGADISMIGQFVGFGFYSAYLVAEK (57)<br>VTVITK (25)<br>HNDDEQYAWESSAGGSFTVR (47)<br>TDTGEPMGR (42)<br>VILHLKEDQTEYLEER (38)<br>EDQTEYLEER (53)<br>HSQFIGYPITLFVEK (44)<br>YIDQEELNK (38)<br>NPDDITNEEYGEFYK (65)<br>SLTNDWEDHLAVK (56)<br>HFSVEGQLEFR (58)<br>ALLFVPR (36)<br>APFDLFENR (44)<br>VFIMDNCELIPEYLNFR (22)<br>GVVDSDELPLNISR (72)<br>CLELFTLEAEDKENYK (38)<br>FYEQFSK (37)<br>LGIHEDSQNR (43)<br>LSELLR (42)<br>YYTSASGDEMVSJK (59)<br>HIYYITGETK (37)<br>DQVANSFAFVER (54)<br>HGLEVIYMIPEIDEYCVQQLK (63)<br>EGLELPEDEEEK (33)<br>LVTSPCCIVTSTYGWTANMER (75)<br>DNSTMGYMAAK (21)<br>HLEINPDHSIETLR (32)                         | 1528         |

|        |                                                          |                                                                                                                                                                                                                                                                                                                                                                                                                                                                                                                                                                                                             |      |
|--------|----------------------------------------------------------|-------------------------------------------------------------------------------------------------------------------------------------------------------------------------------------------------------------------------------------------------------------------------------------------------------------------------------------------------------------------------------------------------------------------------------------------------------------------------------------------------------------------------------------------------------------------------------------------------------------|------|
|        |                                                          | DLVILLYETALLSSGFSLEDPQTHANR (33)<br>LGLGIDEDDPTADDTSAAVTEEMPPLEGDDDDTSR(65)                                                                                                                                                                                                                                                                                                                                                                                                                                                                                                                                 |      |
| P04150 | Glucocorticoid receptor                                  | VSASSPSLAVASQSDSK (21)<br>LLEESIANLNR (33)<br>SQELFDEIR (20)                                                                                                                                                                                                                                                                                                                                                                                                                                                                                                                                                | 35   |
| O14920 | Inhibitor of nuclear factor kappa-B kinase subunit beta  | LLLQAIQSFEK (34)                                                                                                                                                                                                                                                                                                                                                                                                                                                                                                                                                                                            | 34   |
| O15111 | Inhibitor of nuclear factor kappa-B kinase subunit alpha | ESQILLLSDIGSGIR (18)<br>DLKPENIVLQDVGGK (22)<br>GGPVDLTLK (18)<br>IISFLLPPDESLHSLQSR (19)<br>IQLPIQLR (15)                                                                                                                                                                                                                                                                                                                                                                                                                                                                                                  | 30   |
| P11142 | Heat shock cognate 71 kDa protein                        | GPAVGIDLGTTYSCVGVFQHGK (26)<br>VEIANDQGNR (43)<br>VQVEYK (39)<br>STAGDTHLGGEDFDNR (18)<br>DNNLLGK (28)                                                                                                                                                                                                                                                                                                                                                                                                                                                                                                      | 79   |
| Q13451 | Peptidyl-prolyl cis-trans isomerase FKBP5                | NNEESPTATVAEQGEDITSKK (79)<br>RVNGEETPMIGDK (28)<br>VGNGEETPMIGDK (51)<br>VYVHYK (27)<br>KFDSSHDR (30)<br>NEPFVFLGK (37)<br>AWDIGVATMK (45)<br>IPSNATLFFEIELLDFK (80)<br>GEDLFEDGGIIR (64)<br>GEGYSNPNEGATVEIHLEGR (78)<br>DVAFTVGEDEDHDIPIGDK (63)<br>EEQCILYLGPR (54)<br>YGFGEAGPK (51)<br>FGIEPNAELIYEVTLK (54)<br>AKESWEMDTK (32)<br>EKLEQAAIVK (54)<br>YMQAVIQYGK (49)<br>IVSWLEMEYGLSEK (103)<br>ASESFLAAFLNLAMCYLK (53)<br>AVECCDK (36)<br>ALGLDSANEK (39)<br>GEAQLLMNEFESAK (59)<br>VLEVNPNQK (44)<br>LQISMCK (27)<br>RIYANMFK (26)<br>FAEQDAKEEANK (68)<br>TSEGVNTEK (54)<br>GTDSQAMEEEKPEGHV (55) | 2961 |
| Q16543 | Hsp90 co-chaperone Cdc37                                 | MEQFQK (18)<br>ELEVAEGGK (37)<br>LQAEAAQLR (21)<br>TEEDSEVR (34)<br>LGPGGDPVEVYESLPEELQK (22)<br>EGEEAGPGDPLLEAVPK (43)<br>TGDEKDVSV (43)                                                                                                                                                                                                                                                                                                                                                                                                                                                                   | 206  |
| P60709 | Actin                                                    | AGFAGDDAPR (48)<br>HQGVMMVGMGQK (35)<br>DSYVGDEAQSK (34)<br>DSYVGDEAQSK (32)<br>IWHHTFYNELR (41)<br>VAPEEHPVLLTEAPLNPK (25)<br>TTGIVMDSGDGVTHTVPIYEGYALPHAILR (57)<br>LDLAGR (29)<br>DLTDYLMK (38)<br>ILTER (26)<br>GYSFTTAER (57)<br>SYELPDGQVITIGNER (47)<br>KDLYANTVLSGGTTMYPGIADR (46)<br>DLYANTVLSGGTTMYPGIADR (83)<br>EITALAPSTMK (32)<br>QEYDESGPSIVHR (57)                                                                                                                                                                                                                                          | 756  |
| O95433 | Activator of 90 kDa heat shock protein ATPase            | LDGEASINNR (36)<br>LNWTGTSK (22)<br>DEPDTNLVALMK (38)<br>EAMGIYSTLK (29)                                                                                                                                                                                                                                                                                                                                                                                                                                                                                                                                    | 85   |

|  |  |                          |  |
|--|--|--------------------------|--|
|  |  | FHMVDGNVSGEFTDLVPEK (30) |  |
|--|--|--------------------------|--|
